# Supplementary material for: The roles of mental health education teachers (MHETs) in China: A content analysis of policy documents
Source: Research Square preprint supplement (doi:10.21203/rs.3.rs-6870592/v1), 2025-12-18
Supplement: Supplementary file 1 [file b4d97d17eb063d4c59bc5f44.xlsx]

## Sheet: policy and coding
issuing time	document number	policy excerpt	responsibility (Chinese)	responsibility	roles
2012	Z1	加强对留守学生心理健康教育，建立留守学生安全保护预警与应急机制	协助转介和危机管理	Facilitate referral and crisis management	Collaborator
2012	Z3	预防和解决发展过程中的心理行为问题—学生	提供心理咨询	Provide counseling	Counselor
2012	Z3	在应急和突发事件中及时危机管理—学生	协助转介和危机管理	Facilitate referral and crisis management	Collaborator
2012	Z3	对有心理困扰或心理问题的学生，进行科学有效的心理辅导—学生	提供心理咨询	Provide counseling	Counselor
2012	Z3	及时给予必要的危机干预—学生	协助转介和危机管理	Facilitate referral and crisis management	Collaborator
2012	Z3	心理健康教育课应以活动为主，可以采取多种形式，包括团体辅导、心理训练、问题辨析、情境设计、角色扮演、游戏辅导、心理情景剧、专题讲座等。	开设心理健康课程	Teach courses in mental health	Instructor
2012	Z3	普及心理健康知识，了解心理调节方法，树立心理健康意识，掌握心理保健常识和技能—学生	开设心理健康课程	Teach courses in mental health	Instructor
2012	Z3	对个别有严重心理疾病的学生，能够及时识别并转介到相关心理诊治部门—学生/相关机构	协助转介和危机管理	Facilitate referral and crisis management	Collaborator
2012	Z3	学校要帮助家长树立正确的教育观念，了解和掌握孩子成长的特点、规律以及心理健康教育的方法，加强亲子沟通，注重自身良好心理素质的养成，以积极健康和谐的家庭环境影响孩子—家长	提供支持性资源	Provide supportive resources	Collaborator
2012	Z3	为家长提供促进孩子发展的指导意见，协助他们共同解决孩子在发展过程中的心理行为问题—家长	提供支持性资源	Provide supportive resources	Collaborator
2012	Z3	加强与基层群众性自治组织、企事业单位、社会团体、公共文化机构、街道社区以及青少年校外活动场所等的联系和合作，组织开展各种有益于中小学生身心健康的文体娱乐活动和心理素质拓展活动，拓宽心理健康教育的途径。	开设心理健康课程	Teach courses in mental health	Instructor
2012	Z3	组织专家学者、教研人员、一线教师和学校管理人员结合实际情况积极开展心理健康教育教学研究	开设心理健康课程	Teach courses in mental health	Instructor
2012	Z3	各地和学校要通过多种途径和方式，结合教育教学实际，保证心理健康教育时间，课时可在地方课程或学校课程中安排	开设心理健康课程	Teach courses in mental health	Instructor
2012	Z3	学校要利用地方课程或学校课程科学系统地开展心理健康教育	开设心理健康课程	Teach courses in mental health	Instructor
2012	Z4	开设满足学生需要的心理健康教育课程并纳入教学计划—学生	开设心理健康课程	Teach courses in mental health	Instructor
2012	Z3	遵循心理发展和教育规律，向学生提供发展性心理辅导和帮助	实施心理辅导与关怀	Offer developmental guidance	Guide
2012	Z4	识别：多种形式的心理检测和评估，帮助学生了解自己心理素质—学生	实施心理辅导与关怀	Offer developmental guidance	Guide
2012	Z4	训练：针对问题提出解决方法和技巧，组织学生参与活动—学生	实施心理辅导与关怀	Offer developmental guidance	Guide
2012	Z4	感悟：对训练中的心理感受、情感体验、行为变化、活动过程及效果进行反思—学生	实施心理辅导与关怀	Offer developmental guidance	Guide
2012	Z4	创先学生心理健康教育的社团组织，开展多种形式、内容丰富的心理健康宣传教育活动	实施心理辅导与关怀	Offer developmental guidance	Guide
2013	Z5	班主任和心理教师要密切关注留守儿童思想动向，主动回应留守儿童心理诉求，不断加强师生情感沟通交流，努力弥补留守儿童家庭温暖的缺失。——学生	实施心理辅导与关怀	Offer developmental guidance	Guide
2013	Z5	对学习困难的留守儿童进行有针对性地辅导，激发其学习兴趣，不断提高自主学习能力。	实施心理辅导与关怀	Offer developmental guidance	Guide
2013	Z5	学校要重视留守儿童心理健康教育，将其作为重要内容纳入教育教学计划。——学生	开设心理健康课程	Teach courses in mental health	Instructor
2013	Z6	在中等职业学校经济政治与社会、哲学与人生、职业道德与法律、职业生涯规划四门德育必修课和心理健康选修课的教学中，要根据学生的身心发展特点和认知水平，结合具体教学内容，帮助学生领会党的十八大的主题	开设心理健康课程	Teach courses in mental health	Instructor
2013	Z6	在教学中，要结合“心理健康基本知识”单元的教学，帮助学生全面理解身心健康的理念，树立心理健康意识，主动进行心理调适，追求身心协调发展，促进学生形成良好的个性心理品质。 ——学生	开设心理健康课程	Teach courses in mental health	Instructor
2013	Z6	在教学中，要结合“悦纳自我，健康成长”单元的教学，引导学生培养积极、乐观、勇敢、坚强等心理品质，帮助学生掌握适当的心理疏导方法，提高应对挫折、适应社会的能力。——学生	开设心理健康课程	Teach courses in mental health	Instructor
2013	Z6	结合“提升职业心理素质”单元的教学，帮助学生认识保持积极向上的良好心态的重要性，增强应对职业挫折和创业挑战的能力，在职业体验和职业实践中提高职业心理素质，树立自尊自信、理性平和、积极向上的心态。——学生	开设心理健康课程	Teach courses in mental health	Instructor
2014	Z7	心理健康基本知识和方法教育；青春期心理健康教育；职业心理素质教育；	开设心理健康课程	Teach courses in mental health	Instructor
2014	Z7	学校要根据学生生理、心理特点，合理设置心理健康教育内容	开设心理健康课程	Teach courses in mental health	Instructor
2014	Z7	针对学生在学习、生活和求职就业等方面可能遇到的心理问题，开展心理辅导或援助，加强人文关怀和心理疏导，培养学生良好的心理素质，促进学生身心健康发展	实施心理辅导与关怀	Offer developmental guidance	Guide
2014	Z7	心理咨询、辅导和援助	提供心理咨询	Provide counseling	Counselor
2014	Z8	加强课程建设，保证心理健康教育时间，合理安排教育内容，创新活动形式，科学有效开展心理健康教育	开设心理健康课程	Teach courses in mental health	Instructor
2014	Z8	加强生命教育和青春期教育，促进学生身心和谐发展。	开设心理健康课程	Teach courses in mental health	Instructor
2014	Z9	重点加强对留守儿童和孤儿、残疾儿童、自闭症儿童的心理辅导——学生	实施心理辅导与关怀	Offer developmental guidance	Guide
2014	Z9	注重留守儿童心理健康教育和亲情关爱—学生	实施心理辅导与关怀	Offer developmental guidance	Guide
2014	Z9	及早发现和纠正个别留守儿童的不良行为—学生	实施心理辅导与关怀	Offer developmental guidance	Guide
2014	Z9	强化父母和其他监护人的监护责任并提高其监护能力，加强家庭教育指导服务，引导外出务工家长以各种方式关心留守儿童。	提供支持性资源	Provide supportive resources	Collaborator
2014	Z10	心理健康教育教师要有相关心理学教育背景或取得相关资格证书，经过岗前培训，能够胜任心理健康教育教学工作。	开设心理健康课程	Teach courses in mental health	Instructor
2014	Z10	每年对专兼职心理健康教育教师和班主任的心理健康教育的培训不少于10课时。定期开展心理健康教育学习交流和教研活动。	开设心理健康课程	Teach courses in mental health	Instructor
2014	Z10	开设专门的心理健康教育课程，并列入课程表，课时可在地方课程或学校课程中安排，一般每班每两周1课时。	开设心理健康课程	Teach courses in mental health	Instructor
2014	Z10	每学期都要通过心理健康教育节（月、周），学生心理社团，宣传栏、校园广播、电视、网络等校园媒介开展形式多样的心理健康教育活动，营造良好的心理健康教育氛围。	实施心理辅导与关怀	Offer developmental guidance	Guide
2014	Z10	心理辅导室定期对学生开放，每周不少于10小时，主要用于对有需要的学生进行个别或团体辅导。	提供心理咨询	Provide counseling	Counselor
2014	Z10	心理辅导室值班记录、辅导过程记录完整并及时归档，有相应的分析、对策与辅导效果评价。	提供心理咨询	Provide counseling	Counselor
2014	Z10	对个别有严重心理疾病的学生，能够及时识别、转介到相关心理诊治部门并记录在案。	协助转介和危机管理	Facilitate referral and crisis management	Collaborator
2014	Z10	每学年为家长举办1—2次心理健康教育讲座或宣传活动，帮助家长了解和掌握孩子成长的特点、规律以及教育方法。	提供支持性资源	Provide supportive resources	Collaborator
2014	Z10	通过家长委员会、家访等多种途径，了解、反馈学生的心理状况，协助家长或监护人共同解决孩子在发展过程中的心理行为问题。	提供支持性资源	Provide supportive resources	Collaborator
2014	Z10	积极开展心理健康教育科研活动，有相关的研究课题与实验成果。	开设心理健康课程	Teach courses in mental health	Instructor
2015	Z11	开展个别辅导和团体辅导，帮助学生疏导与解决学习、生活、自我意识、情绪调适、人际交往和升学就业中出现的心理行为问题	提供心理咨询	Provide counseling	Counselor
2015	Z11	开展团体心理辅导。关注全体学生的心理健康水平，提高全体学生的心理素质，开展面向全体学生的心理健康教育活动和团体心理辅导活动。	实施心理辅导与关怀	Offer developmental guidance	Guide
2015	Z11	进行个别心理辅导。对有心理困扰或心理问题的学生进行有效的个别辅导，提供有针对性的心理支持	提供心理咨询	Provide counseling	Counselor
2015	Z11	或根据情况及时将其转介到相关专业心理咨询机构或心理诊治部门，并做好协同合作、回归保健和后续心理支持工作。	协助转介和危机管理	Facilitate referral and crisis management	Collaborator
2012	Z3	谨慎使用心理测试量表或其他测试手段，不能强迫学生接受心理测试，禁止使用可能损害学生心理健康的仪器	评估和记录心理健康	Assess and record student mental health	Monitor
2015	Z11	了解和监测全体师生的心理健康状况、特点和发展趋势，及时发现问题，有效监控、防范和应对各种突发事件，减小危机事件对师生的消极影响	评估和记录心理健康	Assess and record student mental health	Monitor
2015	Z11	营造心理健康环境。对有需要的教职工进行心理辅导和心理支持，提高其心理健康水平，营造积极、健康、和谐的育人环境。	实施心理辅导与关怀	Offer developmental guidance	Guide
2015	Z11	举办心理健康教育宣传活动，帮助家长了解和掌握孩子成长的特点、规律以及教育方法，协助家长共同解决孩子发展过程中的心理行为问题。	提供支持性资源	Provide supportive resources	Collaborator
2015	Z11	为学生建立成长信息记录。一般包括学生的基本情况、家庭情况、心理状况、辅导记录等。辅导记录一般包括学生目前的心理状况、辅导的主要问题及问题的评估和鉴定，并有相应的分析、对策与辅导效果评价。	评估和记录心理健康	Assess and record student mental health	Monitor
2015	Z11	学生成长信息记录、测评资料、信件、录音录像和其他资料，应在严格保密的情况下保存。	评估和记录心理健康	Assess and record student mental health	Monitor
2015	Z11	明确心理危机干预工作流程，出现危机事件时能够做到发现及时、处理得当，给予师生适当的心理干预，预防因心理危机引发的自伤、他伤等极端事件的发生。	协助转介和危机管理	Facilitate referral and crisis management	Collaborator
2015	Z11	对个别有严重心理疾病的学生，或发现其他需要转介的情况，能够识别并及时转介到相关心理诊治部门。转介过程记录详实，并建立跟踪反馈制度。	协助转介和危机管理	Facilitate referral and crisis management	Collaborator
2015	Z11	心理辅导室应定期组织教研活动、典型案例讨论、组织参加专家督导，定期开展心理健康普查和心理健康调查研究，不断提高心理辅导的科学性与实效性。	开设心理健康课程	Teach courses in mental health	Instructor
2016	Z12	及早发现并纠正心理问题和不良行为—学生	实施心理辅导与关怀	Offer developmental guidance	Guide
2016	Z13	各校要集中对学生开展以校园欺凌治理为主题的专题教育，开展品德、心理健康和安全教育，	开设心理健康课程	Teach courses in mental health	Instructor
2016	Z13	各校要加强校园欺凌治理的人防、物防和技防建设，充分利用心理咨询室开展学生心理健康咨询和疏导，公布学生救助或校园欺凌治理的电话号码并明确负责人	提供心理咨询	Provide counseling	Counselor
2016	Z14	落实《中小学心理健康教育指导纲要（2012年修订）》，培养学生健全人格和积极心理品质，对有心理困扰或心理问题的学生开展科学有效的心理辅导，提高其心理健康水平。——学生	提供心理咨询	Provide counseling	Counselor
2016	Z14	对遭受欺凌和暴力的学生及其家人提供帮助，及时开展相应的心理辅导和家庭支持，帮助他们尽快走出心理阴影，树立自信，恢复正常学习生活。——学生	提供心理咨询	Provide counseling	Counselor
2016	Z14	中小学校要制定防治学生欺凌和暴力工作制度，将其纳入学校安全工作统筹考虑，健全应急处置预案，建立早期预警、事中处理及事后干预等机制。	协助转介和危机管理	Facilitate referral and crisis management	Collaborator
2017	Z17	开展“培育积极的心理品质，培养良好的行为习惯”的心理健康促进活动，提高学生自我情绪调适能力	实施心理辅导与关怀	Offer developmental guidance	Guide
2017	Z17	尤其要关心留守儿童、流动儿童心理健康，为遭受学生欺凌和校园暴力、家庭暴力、性侵犯等儿童青少年提供及时的心理创伤干预。	提供心理咨询	Provide counseling	Counselor
2017	Z18	开展认识自我、尊重生命、学会学习、人际交往、情绪调适、升学择业、人生规划以及适应社会生活等方面教育——学生	开设心理健康课程	Teach courses in mental health	Instructor
2017	Z18	课程育人、充分发挥课堂教学的主渠道作用——学生	开设心理健康课程	Teach courses in mental health	Instructor
2017	Z18	活动育人、要精心设计、组织开展主题明确、内容丰富、形式多样、吸引力强的教育活动——学生	开设心理健康课程	Teach courses in mental health	Instructor
2017	Z18	实践育人、要与综合实践活动课紧密结合，广泛开展社会实践、利用体育科研院所、心理服务机构、儿童保健机构等开展健康教育。——学生、社会机构	开设心理健康课程	Teach courses in mental health	Instructor
2017	Z18	要加强对经济困难家庭子女、单亲家庭子女、学习困难学生、进城务工人员随迁子女、农村留守儿童等群体的教育关爱 ……积极开展心理辅导，提供情感关怀，引导学生心理、人格积极健康发展。——学生	实施心理辅导与关怀	Offer developmental guidance	Guide
2017	Z18	统筹安排地方和学校课程，开展法治教育、廉洁教育、反邪教教育、文明礼仪教育、环境教育、心理健康教育、劳动教育、毒品预防教育、影视教育等专题教育。——学生	开设心理健康课程	Teach courses in mental health	Instructor
2017	Z18	及时了解、沟通和反馈学生思想状况和行为表现，认真听取家长对学校的意见和建议，促进家长了解学校办学理念、教育教学改进措施，帮助家长提高家教水平。	提供支持性资源	Provide supportive resources	Collaborator
2018	Z19	要密切与村（社区）联动，及时了解遭受欺凌、校园暴力、家庭暴力、性侵犯以及沾染毒品等学生情况，并提供心理创伤干预	提供心理咨询	Provide counseling	Counselor
2018	Z19	要定期对教师开展心理评估，根据评估结果有针对性地开展教师心理疏导工作	评估和记录心理健康	Assess and record student mental health	Monitor
2019	Z20	各级各类学校要积极开展生命教育、亲情教育、爱国教育，培养学生珍视生命、热爱家人、爱国爱民的意识，培育积极心理品质。	开设心理健康课程	Teach courses in mental health	Instructor
2019	Z20	有条件的家长学校或家庭教育指导服务站点每年至少开展一次面向家长和子女的心理健康教育。	提供支持性资源	Provide supportive resources	Collaborator
2019	Z20	学校要对面临升学压力的初三、高三学生及家长开展心理辅导。	实施心理辅导与关怀	Offer developmental guidance	Guide
2019	Z20	对贫困、留守、流动、单亲、残疾、遭遇校园欺凌、丧亲等处境不利学生给予重点关爱，必要时开展心理干预。——学生	提供心理咨询	Provide counseling	Counselor
2019	Z20	对精神障碍患者的子女，开展家庭关爱教育、辅助成长。——学生	提供支持性资源	Provide supportive resources	Collaborator
2019	Z20	对一般不良行为青少年进行心理辅导和批评教育	提供心理咨询	Provide counseling	Counselor
2019	Z20	对疑似有心理行为问题或精神障碍的学生，教育部门要指导家长陪同学生到医疗机构寻求专业帮助	协助转介和危机管理	Facilitate referral and crisis management	Collaborator
2019	Z20	对患有精神障碍的学生，教育部门应当协助家庭和相关部门做好心理服务，建立健全病情稳定患者复学机制	协助转介和危机管理	Facilitate referral and crisis management	Collaborator
2019	Z20	中小学结合家长会等活动，每年对学生家长开展至少一次心理健康知识培训—家长	提供支持性资源	Provide supportive resources	Collaborator
2021	Z21	切实加强中小学生思想品德教育、法治教育和心理健康教育——学生	开设心理健康课程	Teach courses in mental health	Instructor
2021	Z21	学校要对全校学生开展全面梳理排查，与家长进行深入沟通交流，了解掌握学生心理状况、思想情绪和同学关系状况，及时查找发生欺凌事件的苗头迹象或隐患点——学生	评估和记录心理健康	Assess and record student mental health	Monitor
2021	Z21	学校要对全校学生开展全面梳理排查，与家长进行深入沟通交流，了解掌握学生心理状况、思想情绪和同学关系状况，及时查找发生欺凌事件的苗头迹象或隐患点——学生	及时沟通心理健康状况	Promote communication about student mental health	Collaborator
2021	Z21	对遭受欺凌的学生，学校要给予相应的心理辅导——学生	提供心理咨询	Provide counseling	Counselor
2021	Z21	深入开展思想道德教育、法治教育、心理健康教育，引导学生养成良好思想品德和行为习惯——学生	开设心理健康课程	Teach courses in mental health	Instructor
2021	Z22	课堂教学—学生	开设心理健康课程	Teach courses in mental health	Instructor
2019	Z20	对贫困、留守、流动、单亲、残疾、遭遇校园欺凌、丧亲等处境不利学生给予重点关爱	实施心理辅导与关怀	Offer developmental guidance	Guide
2021	Z22	及早分类疏导各种压力—学生 （针对学生在学习、生活、人际关系和自我意识等方面可能遇到的心理失衡问题，主动采取举措，避免因压力无法缓解而造成心理危机）	实施心理辅导与关怀	Offer developmental guidance	Guide
2021	Z22	帮助家长更加了解孩子所处年龄段的心理特点和规律—家长	提供支持性资源	Provide supportive resources	Collaborator
2021	Z22	定期开展学生心理健康测评工作—学生	评估和记录心理健康	Assess and record student mental health	Monitor
2021	Z22	建立“一生一策”的心理成长档案	评估和记录心理健康	Assess and record student mental health	Monitor
2012	Z10	通过家长委员会、家访等多种途径，了解、反馈学生的心理状况，协助家长或监护人共同解决孩子在发展过程中的心理行为问题。	及时沟通心理健康状况	Promote communication about student mental health	Collaborator
2012	Z11	在辅导过程中严格遵循保密原则，保护学生隐私，但在学生可能出现自伤、他伤等极端行为时，应突破保密原则，及时告知班主任及其监护人，并记录在案；	及时沟通心理健康状况	Promote communication about student mental health	Collaborator
2021	Z22	针对中小学生出现的异常情况，中小学教师要与家长进行密切沟通—家长	及时沟通心理健康状况	Promote communication about student mental health	Collaborator
2021	Z22	对已确证患有心理障碍的学生：研判，及时将干预方案告知家长—家长	及时沟通心理健康状况	Promote communication about student mental health	Collaborator
2021	Z22	对出现严重心理危机的学生协助家长送医诊治	协助转介和危机管理	Facilitate referral and crisis management	Collaborator
2016	Z14	对遭受欺凌和暴力的学生及其家人提供帮助，及时开展相应的心理辅导和家庭支持，帮助他们尽快走出心理阴影，树立自信，恢复正常学习生活。——学生	协助转介和危机管理	Facilitate referral and crisis management	Collaborator
2021	Z22	突发事件发生后：及时处理—学生	协助转介和危机管理	Facilitate referral and crisis management	Collaborator
2021	Z22	将心理健康教育课纳入校本课程——学生	开设心理健康课程	Teach courses in mental health	Instructor
2021	Z23	有条件的学校，可以定期组织教职工进行心理健康状况测评，指导、帮助教职工以积极、乐观的心态对待学生。——教职工	评估和记录心理健康	Assess and record student mental health	Monitor
2021	Z23	学校要树立以生命关怀为核心的教育理念，利用安全教育、心理健康教育、环境保护教育、健康教育、禁毒和预防艾滋病教育等专题教育，引导学生热爱生命、尊重生命；——学生	开设心理健康课程	Teach courses in mental health	Instructor
2021	Z23	学校可以根据实际组成由学校相关负责人、教师、法治副校长（辅导员）、司法和心理等方面专业人员参加的专业辅导工作机制，对有不良行为的学生进行矫治和帮扶；——学生；	提供心理咨询	Provide counseling	Counselor
2021	Z23	学校应当建立学生重大生理、心理疾病报告制度，向家长及时告知学生身体及心理健康状况；学校发现学生身体状况或者情绪反应明显异常、突发疾病或者受到伤害的，应当及时通知学生家长。——家长	及时沟通心理健康状况	Promote communication about student mental health	Collaborator
2021	Z23	学校应当关心爱护学生，为身体或者心理受到伤害的学生提供相应的心理健康辅导、帮扶教育。——学生	提供心理咨询	Provide counseling	Counselor
2021	Z24	积极开展生命教育和挫折教育，培养儿童珍爱生命意识和自我情绪调适能力。	开设心理健康课程	Teach courses in mental health	Instructor
2021	Z24	关注和满足孤儿、事实无人抚养儿童、留守儿童和困境儿童心理发展需要。	实施心理辅导与关怀	Offer developmental guidance	Guide
2021	Z26	加强心理健康教育，健全学生心理健康问题定期筛查评估、早期识别与干预的机制。	评估和记录心理健康	Assess and record student mental health	Monitor
2022	Z27	校园欺凌对未成年学生心理影响较大，对于较早染疫学生容易被欺凌，从而容易产生焦虑、抑郁、孤独感甚至自杀想法等，对相关未成年学生需及时给予心理辅导、教育和引导。——学生	提供心理咨询	Provide counseling	Counselor
2022	Z27	全面评估疫情对学生心理健康带来的影响——学生	评估和记录心理健康	Assess and record student mental health	Monitor
2022	Z27	分类实施监测预警和干预等有效措施——学生	评估和记录心理健康	Assess and record student mental health	Monitor
2022	Z27	分类实施监测预警和干预等有效措施——学生	协助转介和危机管理	Facilitate referral and crisis management	Collaborator
2022	Z27	动态开展心理摸排。学校要主动对全体学生心理健康情况进行有针对性地摸排，——学生	评估和记录心理健康	Assess and record student mental health	Monitor
2022	Z27	关注日常，加强对学生日常学业、寝室关系、人际交往、家庭亲子关系的关注，了解和观察学生实时心态变化；——学生	实施心理辅导与关怀	Offer developmental guidance	Guide
2022	Z27	全面评估，及时掌握学生心理问题变化趋势，可从过度恐慌、认知评价和应对反应三方面评估学生当下心理功能水平。——学生	评估和记录心理健康	Assess and record student mental health	Monitor
2022	Z27	一旦发现疑似心理重症，及时与家长/监护人进行沟通，协调资源救治心理重症学生。同时注重对重症学生的隐私保护。——家长	及时沟通心理健康状况	Promote communication about student mental health	Collaborator
2022	Z27	对于存在严重心理问题需重点关注的学生，要加强对学生的日常关心和帮助，及时纾解可能存在的外在负性刺激。——学生	提供心理咨询	Provide counseling	Counselor
2022	Z27	对于存在严重心理问题发生危机需要就医的情况，要第一时间转介专业精神卫生机构；——专业精神卫生机构	协助转介和危机管理	Facilitate referral and crisis management	Collaborator
2022	Z27	对于存在严重心理问题可能导致安全风险的情况，若学生在校外需务必通知监护人提示安全风险、加强看护，必要时送医救治；若学生在校内需通知监护人尽快前往学校，在监护人来校前须派专人看护、确保学生人身安全；若监护人无法及时赶到的，可在监护人知情同意下，将学生送至专业精神卫生机构进行治疗。——监护人/家长	协助转介和危机管理	Facilitate referral and crisis management	Collaborator
2022	Z27	若因特殊原因无法及时送医，学校须做好看护工作、保障学生人身安全，在送医条件成熟后即刻送医救治。——学生	协助转介和危机管理	Facilitate referral and crisis management	Collaborator
2022	Z27	对于发现自杀未遂学生的情况，学校要第一时间介入，成立危机干预工作组、专家组和保障组，包括学校负责同志、教师骨干、辅导员、班主任、心理中心人员等，各类相关人员要尽快赶赴现场，通力合作、各司其职、稳妥处置。——教职工	协助转介和危机管理	Facilitate referral and crisis management	Collaborator
2022	Z27	对于发生因心理问题非正常死亡的情况，学校需配合公安机关调查取证，由公安机关出具相关证明，以备处理善后事宜，同时做好学生亲属心理安抚及各项服务工作，对相关人员，包括学生所在班级同学、处理危机现场的人员、家属等开展哀伤辅导工作。——政府部门、学生家属、学生	协助转介和危机管理	Facilitate referral and crisis management	Collaborator
2022	Z27	健全干预防控机制。围绕心理重症预防和干预各阶段处置的特点，要进一步加强家校落地联动、信息及时互通反馈和医疗资源信息供给等方面工作	协助转介和危机管理	Facilitate referral and crisis management	Collaborator
2022	Z27	定期推送心理健康教育科普信息，帮助监护人掌握心理危机预警常识及出现心理危机的支持性资源，——家庭	提供支持性资源	Provide supportive resources	Collaborator
2022	Z27	及时强化心理疏导。针对当前个别学生恐阳心理等问题，各地和各高校要根据不同学段学生心理发展规律和学生个体差异，研究有效解决办法，分层分类开展心理健康教育——学生	提供心理咨询	Provide counseling	Counselor
2022	Z27	学校各部门要形成心理健康教育合力，利用丰富多彩的形式传播疫情防控知识和技能，帮助学生学会理性面对疫情造成的挫折和困难，避免过度担忧或恐慌心理——学生	开设心理健康课程	Teach courses in mental health	Instructor
2022	Z27	根据学生不同发展阶段的特点，向中小学生提供情绪调适、人际交往、学会学习、生命与成长等课程资源，向大学生提供心理韧性、风险认知、时间管理、未来规划、感情指导等课程资源。——学生	开设心理健康课程	Teach courses in mental health	Instructor
2022	Z27	学校要成立学生突出心理问题防治工作专班，由党政主要负责同志牵头负责，制订专项工作方案和应急处置预案，建立学生心理健康档案和突出问题清单，对心理重症学生实行一人一案、一人一策，做实做细防治工作。——学生	评估和记录心理健康	Assess and record student mental health	Monitor
2022	Z27	利用家长会等渠道，广泛开展学生心理健康知识和预防心理疾病科普，加强家庭教育指导，不断提升家庭的心理健康教育意识和能力。——家长	提供支持性资源	Provide supportive resources	Collaborator
2023	Z28	开设心理健康相关课程—学生	开设心理健康课程	Teach courses in mental health	Instructor
2023	Z28	向家长、校长、班主任和辅导员等群体提供学生常见心理问题操作指南等心理健康“服务包”—家长、校长等教职人员	提供支持性资源	Provide supportive resources	Collaborator
2023	Z28	学校要积极开展学生心理健康监测工作—学生	评估和记录心理健康	Assess and record student mental health	Monitor
2023	Z28	开展心理健康测评—学生 （每学年面向小学高年级、初中、高中、中等职业学校等学生至少开展一次心理健康测评，建立“一生一策”心理健康档案）	评估和记录心理健康	Assess and record student mental health	Monitor
2022	Z27	建立学生心理健康档案	评估和记录心理健康	Assess and record student mental health	Monitor
2023	Z28	建立“一生一策”心理健康档案	评估和记录心理健康	Assess and record student mental health	Monitor
2023	Z28	开展预警和干预工作—学生	协助转介和危机管理	Facilitate referral and crisis management	Collaborator
2023	Z28	强化应急心理援助，有效安抚、疏导和干预—学生/受突发事件影响学生人群	协助转介和危机管理	Facilitate referral and crisis management	Collaborator
2023	Z28	及时转介—学生	协助转介和危机管理	Facilitate referral and crisis management	Collaborator
2019	Z20	开展儿童青少年心理健康相关基础研究和应用研究	开设心理健康课程	Teach courses in mental health	Instructor
2024	Z29	要关心留守儿童、流动儿童的心理健康状况，提供必要的心理疏导与干预。	实施心理辅导与关怀	Offer developmental guidance	Guide
2024	Z29	开展学生心理健康问题的表现与识别、正确维护心理健康方法、心理问题求助渠道和机构等方面的科普宣传，广泛宣传“每个人是自己心理健康第一责任人”的理念。	实施心理辅导与关怀	Offer developmental guidance	Guide
2024	Z29	通过家长学校、家长课堂等开展心理健康知识宣讲、咨询服务	提供支持性资源	Provide supportive resources	Collaborator
2023	Z28	建立健全测评数据安全保护机制，防止信息泄露。	评估和记录心理健康	Assess and record student mental health	Monitor
